# Supplementary material for: Clickable gold-nanoparticles as generic probe precursors for facile photoaffinity labeling application
Source: Royal Society of Chemistry journal article supplement (doi:10.1039/d0ob01688h), 2020-12-17

## Supporting Information

### Clickable gold-nanoparticles as generic probe precursors for facile application of photoaffinity labeling

Kanna Mori, Kaori Sakurai\*

Department of Biotechnology and Life Science, Tokyo University of Agriculture and Technology, Tokyo, 184-8588, Japan

#### 1. General Experimental Methods

NMR experiments were performed at 293 K on JEOL ECX 300, 400 or ECA 500 using 5 mm z-gradient probes and data were processed with Delta software. The spectra are referenced internally according to residual solvent signals of  $\text{CDCl}_3$  ( $^1\text{H}$  NMR;  $\delta = 7.26$  ppm,  $^{13}\text{C}$  NMR;  $\delta = 77.0$  ppm) and  $\text{DMSO}-d_6$  ( $^1\text{H}$  NMR;  $\delta = 2.50$  ppm,  $^{13}\text{C}$  NMR;  $\delta = 39.5$  ppm). Positive ion ESI-TOF-MS data were obtained by JEOL AccuTOF mass spectrometer. MALDI-TOF-MS data were obtained by autoflex speed TOF/TOF (Bruker Daltonics). Unless noted otherwise, all chemical reagents were purchased from Wako Chemicals, TCI and Sigma-Aldrich. Preparative thin-layer chromatography (TLC) was performed using PLC Silica gel 60 F254 pre-coated plates (Merck Millipore). Flash column chromatography was performed using Silica gel 60 (spherical, particle size 40-100  $\mu\text{m}$ ; Kanto Chemical). UV-visible spectra were recorded on a NanoDrop ND-1000 spectrophotometer and VARIAN CARY 50 conc UV-visible spectrophotometer. Fluorescence imaging was scanned with Typhoon 8600 (GE Healthcare Science). CBB-stained and silver stained images were scanned with CanoScan LiDE210 (Cannon).

#### 2. Synthesis of azide-PEG3 lipoate 6, diazirin-PEG3 lipoate 7, PEG2 lipoate 8, alkyne-tagged BzSA 4.

Compound 6-8 were synthesized according to the published procedures.<sup>1</sup> The synthesis and structural characterization of compound 5 was reported previously.<sup>2</sup>

##### 2-1. Synthesis of alkyne-tagged BzSA 4

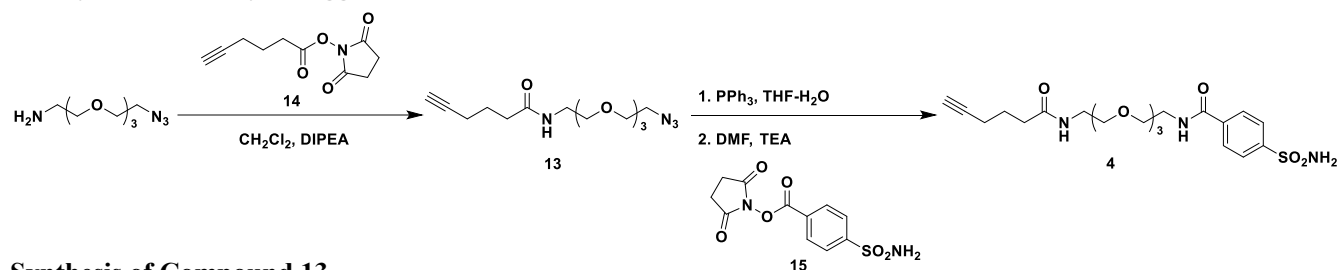

##### Synthesis of Compound 13

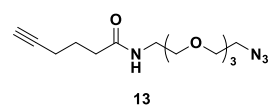

A solution of 5-hexynoic acid (100.8 mg, 0.90 mmol) in dry  $\text{CH}_2\text{Cl}_2$  (2.7 ml) was added *N*-hydroxysuccinimide (NHS) (108.8 mg, 0.945 mmol) and 1-(3-dimethylaminopropyl)-3-ethylcarbodiimide hydrochloride (EDC-HCl, 181.2

mg, 0.945 mmol), and then was stirred at room temperature for 1 h. The mixture was diluted with CH<sub>2</sub>Cl<sub>2</sub> and washed with 10% aqueous NH<sub>4</sub>Cl three times, then with brine. The organic layer was dried over Na<sub>2</sub>SO<sub>4</sub>, which was filtered and concentrated *in vacuo* to give the crude product **14** (167.3 mg) as yellow oil.

A solution of 11-azide-3,6,9-trioxaundecanamine (87.3 mg, 0.40 mmol) in dry CH<sub>2</sub>Cl<sub>2</sub> (1.2 ml) was added crude compound **14** (167.3 mg) and DIPEA (279 μl, 1.6 mmol), and was stirred at room temperature for 3 h. The mixture was concentrated *in vacuo*. The resultant residue was purified by preparative thin layer chromatography (EtOAc/MeOH = 9/1) to give compound **13** (16.2 mg, 0.05 mmol, 13%) as yellow liquid: <sup>1</sup>H NMR (300 MHz, CDCl<sub>3</sub>): δ 6.32 (1H, s), 3.64-3.52 (12H, m), 3.42-3.37 (2H, m), 2.65 (2H, m), 2.32-2.27 (2H, m), 2.26-2.18 (2H, m), 1.97-1.95 (1H, m), 1.84-1.77 (2H, m); <sup>13</sup>C NMR (300 MHz, CDCl<sub>3</sub>): δ 172.5, 83.3, 76.7, 70.2 (×4), 69.6, 69.3, 50.3, 38.9, 34.6, 25.1, 17.5; HRESI-MS calculated for C<sub>14</sub>H<sub>24</sub>N<sub>4</sub>NaO<sub>4</sub> (M+Na<sup>+</sup>): 335.170; found: 335.170.

### Synthesis of alkyne-tagged benzensulfonamide 4

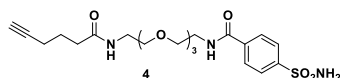

A solution of 4-sulfamoyl benzoic acid (250.0 mg, 1.24 mmol), DIPEA (648  $\mu$ l, 3.7 mmol) and EDC-HCl (397  $\mu$ l, 1.9 mmol) in dry DMF (9.5 mL) was stirred for 5 min at room temperature, and was added *N*-hydroxysuccinimide (185.3 mg, 1.6 mmol) to stir at room temperature for 3 h. The mixture was diluted with EtOAc and was washed with 1 M aqueous HCl three times, saturated aqueous NaHCO<sub>3</sub> solution, then brine. The organic layer was dried over Na<sub>2</sub>SO<sub>4</sub>, and filtered and concentrated *in vacuo*. The residue was co-evaporated with toluene three times and purified by flash column chromatography (EtOAc/hexane = 3/7 to 1/0) to give crude product of compound **15** (83.7 mg) and used in the next step.

To a solution of compound **13** (15.8 mg, 0.05 mmol) in THF (250  $\mu$ l) was added MilliQ water (25  $\mu$ l) and  $\text{PPh}_3$  (13.4 mg, 0.05 mmol), which was stirred at room temperature for 18 h. The mixture was diluted with 1 M aqueous HCl and was washed with EtOAc three times. The aqueous layer was extracted with  $\text{CH}_2\text{Cl}_2$  ten times and the organic layer was dried over  $\text{Na}_2\text{SO}_4$ , filtered and concentrated *in vacuo*, which was used in the next step without further purification.

Crude compound **15** (12.7 mg, 0.04 mmol) in dry DMF (400  $\mu$ l) was added TEA (75  $\mu$ l) and reduced compound **13** (26.2 mg), and then stirred at room temperature for 16 h. The mixture was concentrated *in vacuo*. The residue was purified by preparative thin layer chromatography (MeOH/EtOAc = 1/3) to give compound **4** (11.5 mg, 0.02 mmol, 56%) as yellow liquid:  $^1\text{H}$  NMR (400 MHz, DMSO- $d_6$ ):  $\delta$  8.72 (1H, s), 7.99-7.97 (2H, d), 7.89-7.86 (3H, d), 7.47 (2H, s), 3.53-3.33 (14H, m), 3.16-3.15 (2H, m), 2.77-2.76, 2.77 (1H, t,  $J$  = 4.0 Hz), 2.16-2.11 (4H, m), 1.66-1.61 (2H, m);  $^{13}\text{C}$  NMR (400 MHz, DMSO- $d_6$ ):  $\delta$  172.1, 165.8, 146.7, 137.8, 128.4 ( $\times 2$ ), 126.1 ( $\times 2$ ), 84.7, 72.0, 72.0 ( $\times 2$ ), 70.1 ( $\times 2$ ), 69.6, 69.3, 40.6, 39.0, 34.6, 24.8, 17.9; HRESI-MS calculated for  $\text{C}_{21}\text{H}_{31}\text{N}_3\text{NaO}_7\text{S}$  ( $\text{M} + \text{Na}^+$ ): 492.178; found: 492.179.

### 3. Preparation of functionalized gold nanoparticles

### 3-1. Synthesis of citrate-stabilized gold nanoparticles

Citrate-stabilized gold nanoparticles were synthesized according to the reported procedure.<sup>1</sup> Briefly, to a boiling

solution of  $\text{HAuCl}_4 \cdot 3\text{H}_2\text{O}$  (1 mM) was quickly added a hot aqueous solution of 2% trisodium citrate dihydrate, which was stirred at 100 °C for 10 minutes. After 10 minutes, the color of the mixture changed from violet to dark red. The mixture was diluted up to 40 mL with Milli Q water.

### 3-2. Synthesis of clickable photoreactive gold nanoparticles 1-3.

Bis (*p*-sulfonatophenyl) phenylphosphine (BSPP) dihydrate dipotassium salt (0.5 mg/mL in MilliQ water) was added to 1 mL solution of citrate-stabilized gold nanoparticles prepared in 3-1 and the mixture was stirred on an orbital shaker at 50 °C for 1 h. The resulting mixture was centrifuged at  $18,000 \times g$  at 10 °C for 1 h and the supernatant was carefully removed. The BSPP-stabilized gold nanoparticles were washed with Milli Q water ( $0.5 \text{ mL} \times 3$ ) and were diluted in 0.5 mL MeOH. The stock solutions of compound **6-8** in MeOH (10 mM) were mixed at the desired ratios to be added to a solution of the BSPP-stabilized gold nanoparticles at a molar ratio of 10000:1. The mixture was stirred on a plate shaker at room temperature for 24 h. The functionalized gold nanoparticles were washed with Milli Q water ( $0.5 \text{ mL} \times 3$ ). The concentration of the functionalized gold nanoparticles was determined by the visible absorbance at 520 nm according to the published procedure.<sup>3</sup>

### 3-3. Synthesis of ligand clicked photoaffinity probes 9-12.

The mixed solution of clickable photoreactive gold nanoparticles (50 nM, **1-3**) prepared in 3-2, alkyne-tagged ligand **4** or **5** (125  $\mu\text{M}$ ), ascorbic acid (1.25 mM), tris[[1-(3-hydroxypropyl)-1*H*-1,2,3-triazol-4-yl] methyl] amine (THPTA, 2.5 mM) and  $\text{CuSO}_4 \cdot 5\text{H}_2\text{O}$  (1.25 mM) in DMSO/*t*BuOH/6.5% PEG8000 aq. = 1/1/1 was stirred on a plate shaker at room temperature for 18 h. The reaction was quenched by addition of 100 mM EDTA-3% PEG8000 aq. solution and the reaction mixture was centrifuged at  $18,000 \times g$  at 10 °C for 1.5 h to separate the gold nanoparticles from the unreacted alkyne-tagged ligand. The pellet fraction containing gold nanoparticles was washed once with Milli Q water.

## 4. UV-VIS spectrometric analysis<sup>3</sup>

The solution of variously functionalized gold nanoparticles (2  $\mu\text{L}$ ) was each recorded on a NanoDrop ND-1000 spectrophotometer.

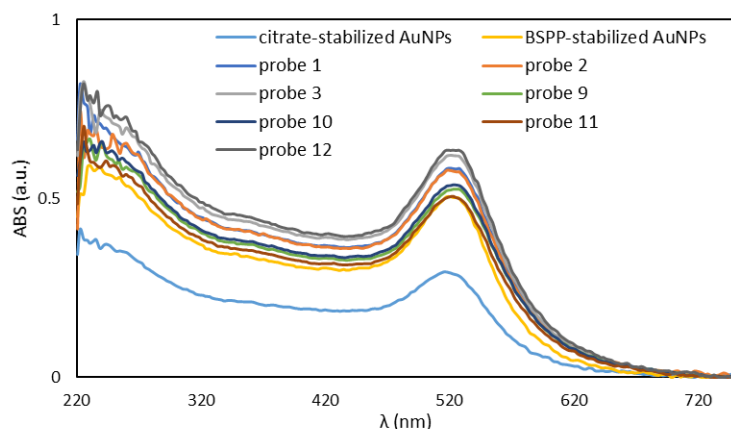

**Figure S1.** UV-VIS spectra of citrate-stabilized gold nanoparticles (0.03 pmol), BSPP-stabilized gold nanoparticles (0.004 pmol), clickable photoreactive gold nanoparticles **1-3** (0.04 pmol) and ligand-clicked photoaffinity probes **9-12**(0.05 pmol).

## 5. MALDI-TOF MS analysis

The solution of functionalized gold nanoparticles (0.1 pmol, **1-3**, **9-12**) and total of 4  $\mu$ L of a matrix solution (10 mg/mL 2,5-dihydroxybenzoic acid in MeCN/H<sub>2</sub>O = 1/1) were alternately spotted onto the sample plate for direct MALDI-TOF MS analysis. MALDI-TOF MS spectra were acquired in the linear mode by Autoflex speed TOF/TOF (Bruker Daltonics). All the MS scans were acquired over the mass range 300-1000 m/z in the linear mode. The MS spectra were externally calibrated using tetraethylene glycol (calc. for C<sub>8</sub>H<sub>18</sub>O<sub>5</sub> 194.23) and dodecaethylene glycol (calc. for C<sub>24</sub>H<sub>50</sub>O<sub>13</sub> 546.65).

| Probe number | Compound   | Chemical formula                                                                                                   | Calculated mass | Observed mass |
|--------------|------------|--------------------------------------------------------------------------------------------------------------------|-----------------|---------------|
| <b>1</b>     | <b>6</b>   | C <sub>16</sub> H <sub>31</sub> N <sub>4</sub> O <sub>4</sub> S <sub>2</sub> (M+H) <sup>+</sup>                    | 407.57          | 407.13        |
|              | <b>7</b>   | C <sub>28</sub> H <sub>48</sub> N <sub>4</sub> NaO <sub>6</sub> S <sub>2</sub> (M+Na-N <sub>2</sub> ) <sup>+</sup> | 623.82          | 623.48        |
|              | <b>8</b>   | C <sub>14</sub> H <sub>27</sub> NNaO <sub>4</sub> S <sub>2</sub> (M+Na) <sup>+</sup>                               | 360.48          | 360.28        |
| <b>2</b>     | <b>6</b>   | C <sub>16</sub> H <sub>31</sub> N <sub>4</sub> O <sub>4</sub> S <sub>2</sub> (M+H) <sup>+</sup>                    | 407.57          | 407.37        |
|              | <b>7</b>   | C <sub>28</sub> H <sub>48</sub> N <sub>4</sub> NaO <sub>6</sub> S <sub>2</sub> (M+Na-N <sub>2</sub> ) <sup>+</sup> | 623.82          | 623.10        |
|              | <b>8</b>   | C <sub>14</sub> H <sub>27</sub> NNaO <sub>4</sub> S <sub>2</sub> (M+Na) <sup>+</sup>                               | 360.48          | 360.28        |
| <b>3</b>     | <b>6</b>   | C <sub>16</sub> H <sub>31</sub> N <sub>4</sub> O <sub>4</sub> S <sub>2</sub> (M+H) <sup>+</sup>                    | 407.57          | 407.09        |
|              | <b>7</b>   | C <sub>28</sub> H <sub>48</sub> N <sub>4</sub> NaO <sub>6</sub> S <sub>2</sub> (M+Na-N <sub>2</sub> ) <sup>+</sup> | 623.82          | 623.47        |
|              | <b>8</b>   | C <sub>14</sub> H <sub>27</sub> NNaO <sub>4</sub> S <sub>2</sub> (M+Na) <sup>+</sup>                               | 360.48          | 360.25        |
| <b>9</b>     | <b>4+6</b> | C <sub>37</sub> H <sub>61</sub> N <sub>7</sub> NaO <sub>11</sub> S <sub>3</sub> (M+Na) <sup>+</sup>                | 899.10          | 898.47        |
|              | <b>7</b>   | C <sub>28</sub> H <sub>48</sub> N <sub>4</sub> NaO <sub>6</sub> S <sub>2</sub> (M+Na-N <sub>2</sub> ) <sup>+</sup> | 623.82          | 623.49        |
|              | <b>8</b>   | C <sub>14</sub> H <sub>27</sub> NNaO <sub>4</sub> S <sub>2</sub> (M+Na) <sup>+</sup>                               | 360.48          | 360.27        |
| <b>10</b>    | <b>4+6</b> | C <sub>37</sub> H <sub>61</sub> N <sub>7</sub> NaO <sub>11</sub> S <sub>3</sub> (M+Na) <sup>+</sup>                | 899.10          | 898.54        |
|              | <b>7</b>   | C <sub>28</sub> H <sub>48</sub> N <sub>4</sub> NaO <sub>6</sub> S <sub>2</sub> (M+Na-N <sub>2</sub> ) <sup>+</sup> | 623.82          | 623.47        |
|              | <b>8</b>   | C <sub>14</sub> H <sub>27</sub> NNaO <sub>4</sub> S <sub>2</sub> (M+Na) <sup>+</sup>                               | 360.48          | 360.27        |
| <b>11</b>    | <b>4+6</b> | C <sub>37</sub> H <sub>61</sub> N <sub>7</sub> NaO <sub>11</sub> S <sub>3</sub> (M+Na) <sup>+</sup>                | 899.10          | 898.57        |
|              | <b>7</b>   | C <sub>28</sub> H <sub>48</sub> N <sub>4</sub> NaO <sub>6</sub> S <sub>2</sub> (M+Na-N <sub>2</sub> ) <sup>+</sup> | 623.82          | 623.13        |
|              | <b>8</b>   | C <sub>14</sub> H <sub>27</sub> NNaO <sub>4</sub> S <sub>2</sub> (M+Na) <sup>+</sup>                               | 360.48          | 360.26        |
| <b>12</b>    | <b>5+6</b> | C <sub>47</sub> H <sub>77</sub> N <sub>5</sub> NaO <sub>6</sub> S <sub>2</sub> (M+Na) <sup>+</sup>                 | 883.26          | 883.59        |
|              | <b>7</b>   | C <sub>28</sub> H <sub>48</sub> N <sub>4</sub> NaO <sub>6</sub> S <sub>2</sub> (M+Na-N <sub>2</sub> ) <sup>+</sup> | 623.82          | 623.32        |
|              | <b>8</b>   | C <sub>14</sub> H <sub>27</sub> NNaO <sub>4</sub> S <sub>2</sub> (M+Na) <sup>+</sup>                               | 360.48          | 360.15        |

**Table S1.** MALDI-TOF MS peaks detected for clickable photoreactive gold nanoparticles (**1-3**) and ligand-clicked photoaffinity probes (**9-12**).

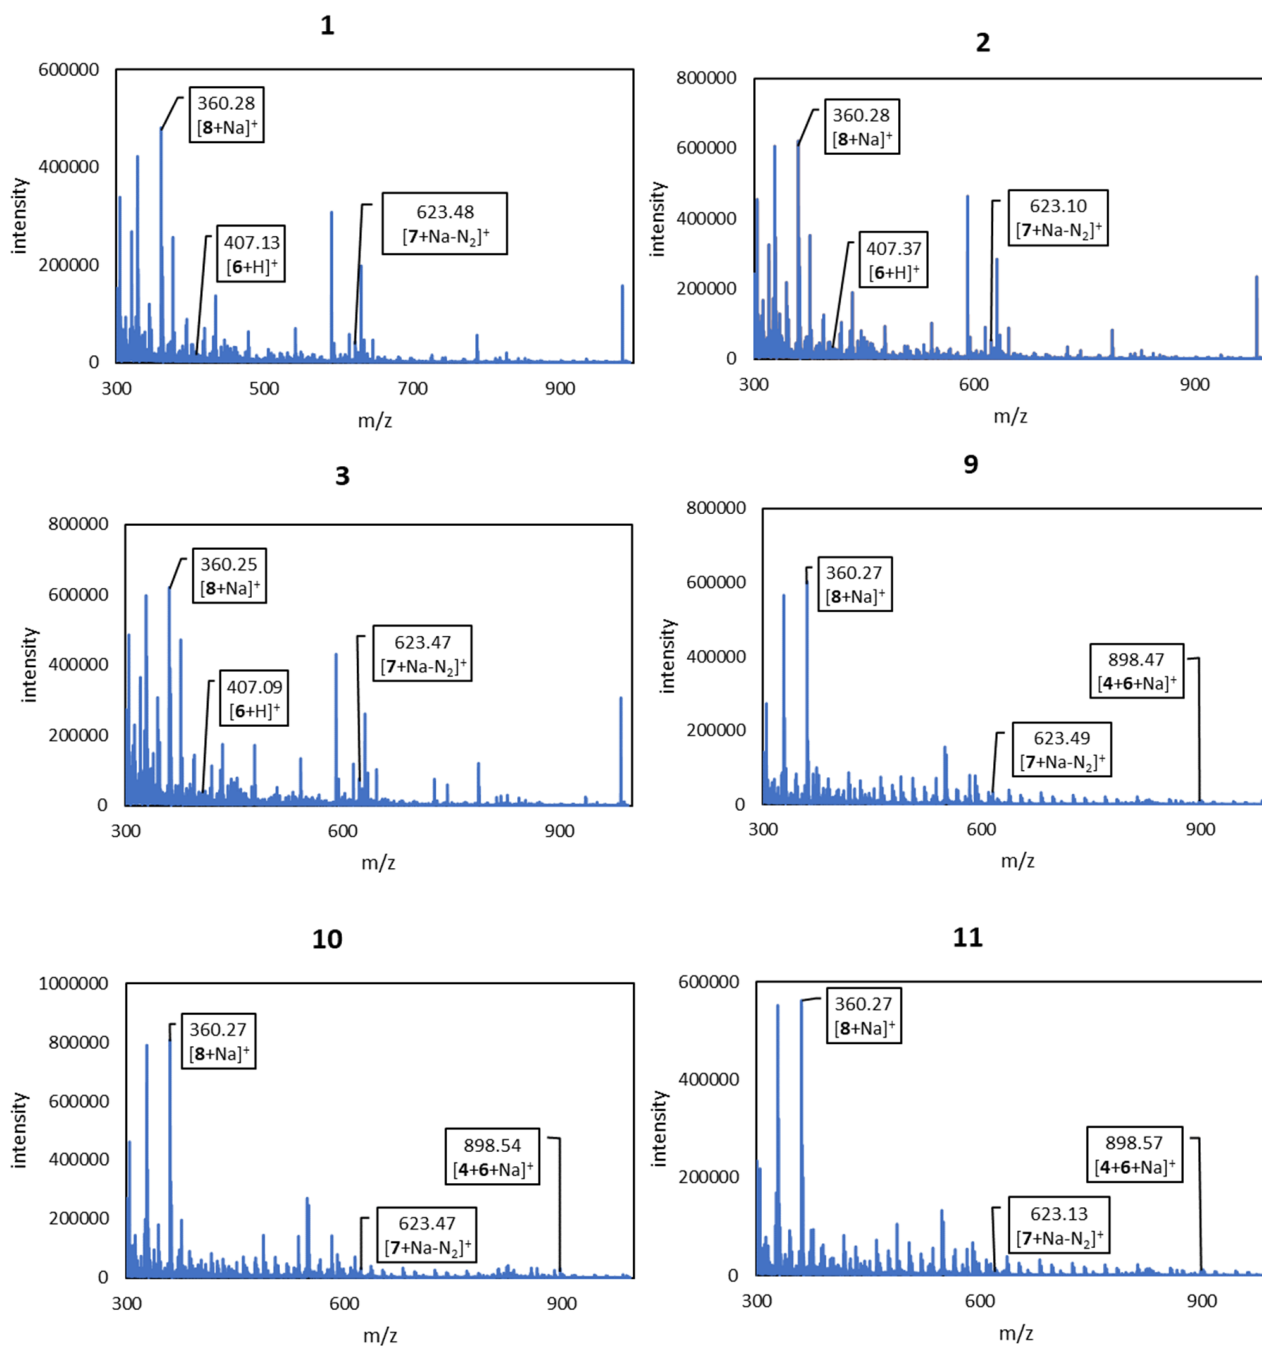

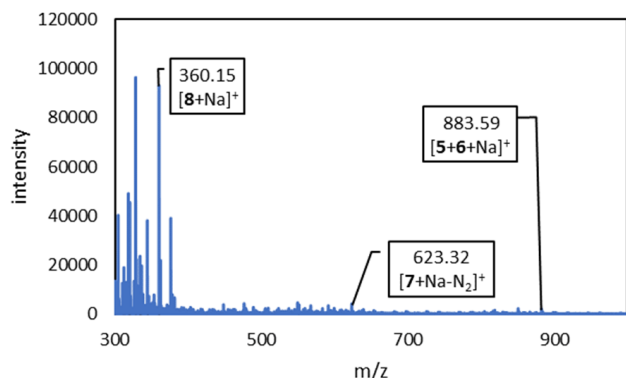

**Figure S2.** MALDI-TOF MS spectra detected for clickable photoreactive gold nanoparticles (**1-3**) and ligand-clicked photoaffinity probes (**9-12**).

## 6. Agarose gel analysis

0.2 pmol aliquots of clickable photoreactive gold nanoparticles (**1-3**) and ligand-clicked photoaffinity probes (**9-12**) were suspended in 50% glycerol/H<sub>2</sub>O and were electrophoresed in 0.5×TBE buffer (44.5 mM Tris, 44.5 mM boric acid, 1 mM EDTA) for 30 min at 100 mV using a 0.5% agarose gel.

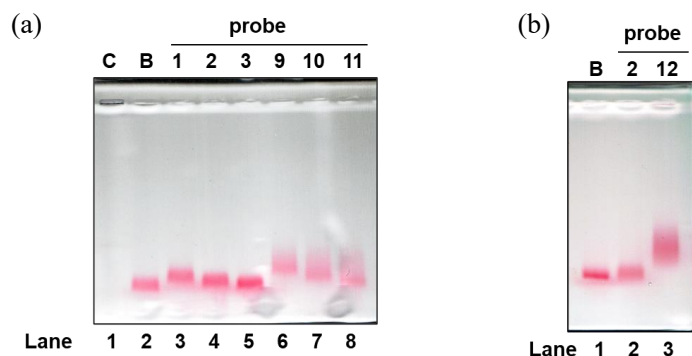

**Figure S3.** Agarose gel analysis of (a) clickable photoreactive gold nanoparticles **1-3** and ligand-clicked photoaffinity probes **9-11**, and (b) **2** and **12**, using 0.5% gel. C: citrate-stabilized gold nanoparticles; B: BSPP-stabilized gold nanoparticles.

## 7. General procedures for photoaffinity labeling experiments using photoaffinity probes 9-12.

### 7-1. Photoaffinity labeling reactions of 9-11 with purified proteins.

bCAII (1.5 μg, 1 μM) and the photoaffinity probe (1 pmol) were mixed in a total volume of 50 μL (20 nM) of 6.5% PEG-HEPES buffer (6.5% PEG8000, 10 mM HEPES pH 7.5, 150 mM NaCl),<sup>6</sup> which was incubated on a rotary mixer at 4 °C for 2 h. For a negative control experiment under the competitive binding condition, 5 mM DMSO stock solution of 4-sulfamoyl benzoic acid (BzSA, final concentration of 100 μM) was added to the reaction mixture. For a selective PAL reaction by probe **9-11** in the presence of excess BSA, BSA (17 μg) was included in the reaction mixture. The

reaction mixture was irradiated at 365 nm at a distance of 5 cm on ice for 20 min using a UV lamp (15W, UVP XX Series) then was diluted in 500  $\mu$ L of 6.5% PEG-PBS (for reactions with bCAII only) or 500  $\mu$ L of 1% CHAPS-PBS (for reactions with a mixture of bCAII and BSA) to be transferred to a new microcentrifuge tube. It was centrifuged at  $18,000 \times g$  at 10  $^{\circ}$ C for 1 h to remove the supernatant and the pellet was resuspended in 500  $\mu$ L of 1% CHAPS-PBS by sonicating briefly and agitating on a vortex mixer. The mixture was centrifuged at  $18,000 \times g$  for 1 h to remove the supernatant, then washed once with 500  $\mu$ L of 1% CHAPS-1% OG-PBS and finally with 500  $\mu$ L of 1% CHAPS-PBS. The resultant pellet was suspended in 6 $\times$  Lammali sample buffer (187.5 mM Tris, 3.8% SDS, 2.0 M glycerol, 0.28 mM bromophenol blue, pH 6.8) containing 10% 2-mercaptoethanol and 9% dithiothreitol (DTT) to elute the labeled proteins by heating at 95  $^{\circ}$ C for 10 min  $\times$  3. The eluate was centrifuged at  $18,000 \times g$  at room temperature for 10 min and the supernatant sample was resolved by SDS-PAGE using 10% gel. The resultant gel was stained by Flamingo Fluorescent Gel stain (Biorad) and analyzed by fluorescence imaging on Typhoon 8600 (GE Healthcare Science). The crosslinking yields (%) were calculated based on the fluorescence intensity of the protein used for a given reaction.

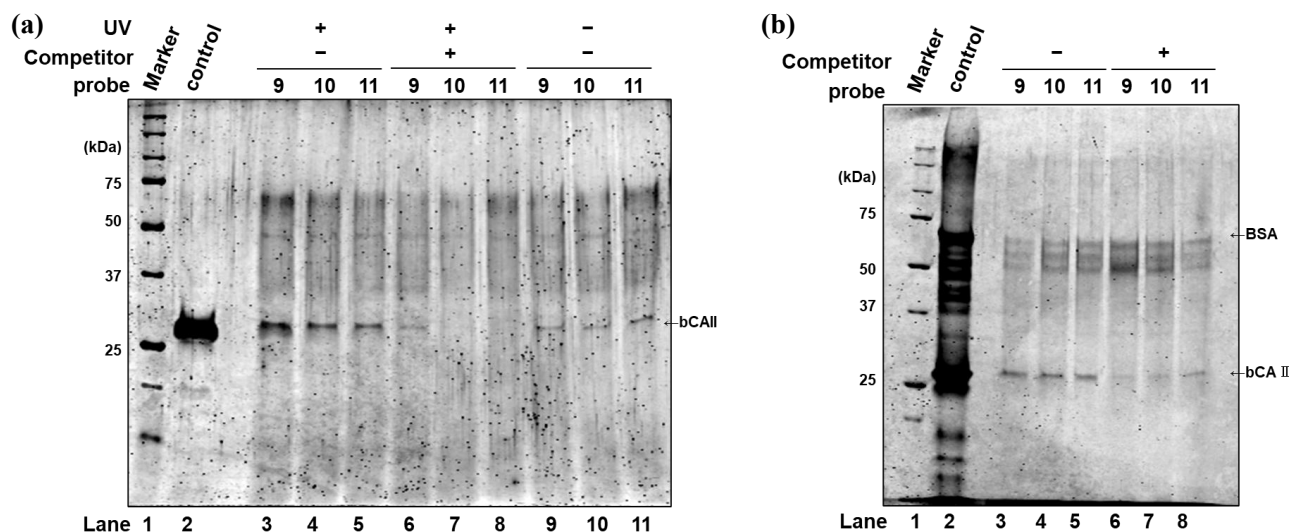

**Figure S4.** (a) SDS-PAGE analysis of PAL reaction using **9-11** (20 nM) and bCAII (1.5  $\mu$ g) in 6.5% PEG-HEPES (pH 7.5) visualized by fluorescent Flamingo Pink stain. Lane 1: molecular weight maker, lane 2: bCAII input (1.5  $\mu$ g), lane 3-5: photocrosslinked bCAII by **9-11**, lane 6-8: negative control experiment using **9-11** with excess BzSA (100  $\mu$ M), lane 9-11: negative control experiment with no UV irradiation using **9-11**. (b) Selectivity of PAL between **9-11** (20 nM) and a mixture of bCAII (1.5  $\mu$ g) and BSA (17  $\mu$ g) in 1% CHAPS-HEPES buffer (pH 7.5) analyzed by SDS-PAGE and fluorescence imaging. Lane 1: molecular weight maker, lane 2: protein mixture input including bCAII (1.5  $\mu$ g) and BSA (3.3  $\mu$ g), lane 3-5: photocrosslinked bCAII by **9-11**, lane 6-8: negative control experiment using **9-11** in the presence of excess benzenesulfonamide (100  $\mu$ M) as a competitor.

## 7-2. Time course analysis of photoaffinity labeling by probe 10.

bCAII (1.5  $\mu$ g, 1  $\mu$ M) and probe **10** (1 pmol, 20 nM) were mixed in 50  $\mu$ L of 6.5% PEG-HEPES buffer, which was incubated on a rotary mixer at 4  $^{\circ}$ C for 2 h. The mixture was irradiated at 365 nm at a distance of 5 cm on ice for 1, 5, 10, 20, 40, 60 min using a UV lamp (15W, UVP XX Series). The reaction mixture was diluted in 500  $\mu$ L of 6.5% PEG-

PBS to be transferred to a new microcentrifuge tube and was centrifuged at  $18,000 \times g$  at  $10^\circ\text{C}$  for 1 h to remove the supernatant. The pellet was resuspended in 500  $\mu\text{L}$  of 1% CHAPS-PBS by sonicating briefly and agitating on a vortex mixer and the mixture was centrifuged at  $18,000 \times g$  for 1 h to remove the supernatant. The same cycle was repeated once more. The resultant pellet was suspended in 6 $\times$ Lammas sample buffer containing 10% 2-mercaptoethanol to elute the labeled proteins by heating at  $95^\circ\text{C}$  for  $10\text{ min} \times 3$ . The eluate was centrifuged at  $18,000 \times g$  at room temperature for 10 minutes. The crosslinked-bCAII was analyzed as in 7-1.

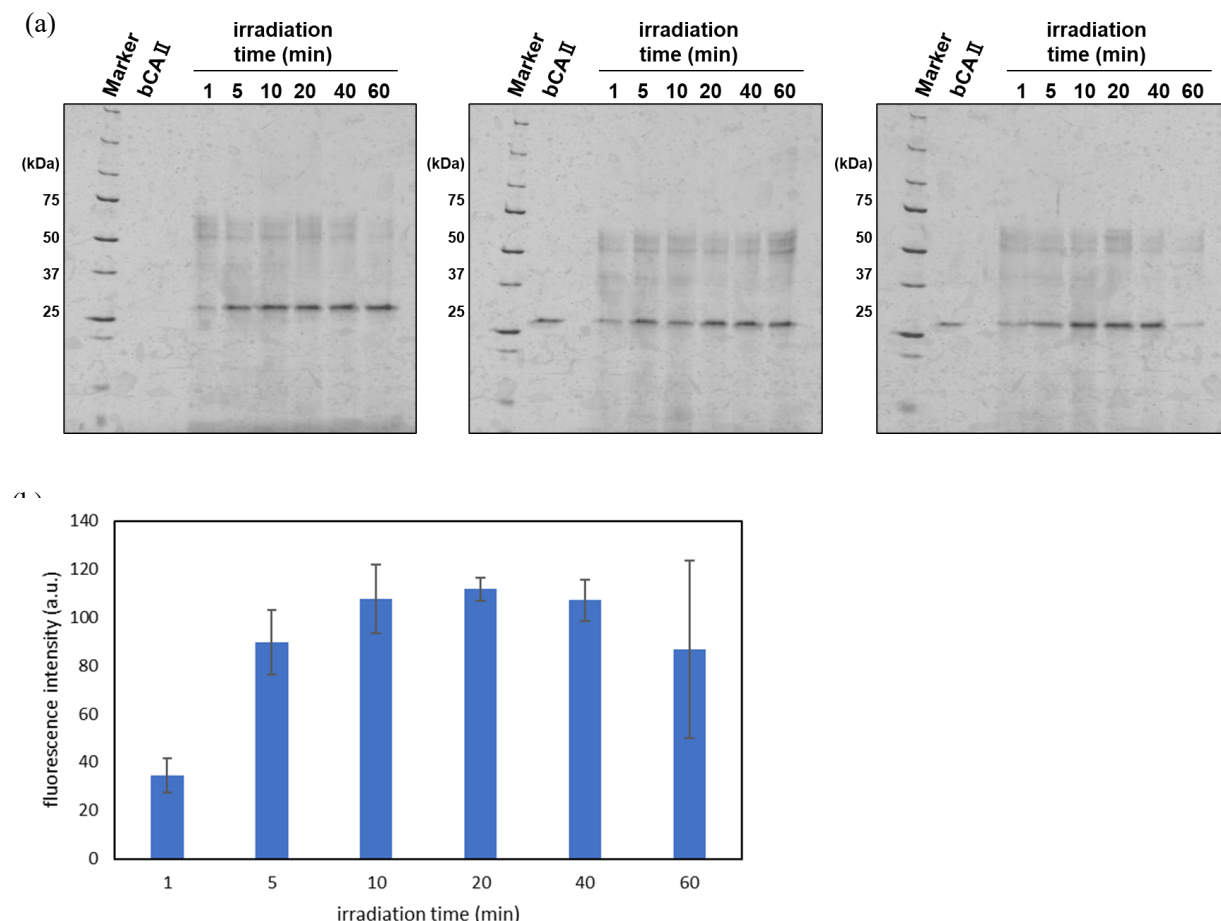

**Figure S5.** (a) SDS-PAGE analysis of the time course of PAL reaction between **10** (20 nM) and bCAII (1.5  $\mu\text{g}$ , 1  $\mu\text{M}$ ) in 6.5% PEG-HEPES buffer (pH 7.5) performed in triplicate. (b) The bar graph showing the averaged fluorescence intensity calculated for each time point in (a). Error bars show standard errors ( $n=3$ )

### 7-3. MALDI-TOF-MS analysis of bCAII obtained by PAL reaction with probe 10.

The PAL reaction of probe **10** with a mixture of bCAII and BSA was conducted in 6.5% PEG-HEPES buffer as described in the section 7.1 was diluted in 300  $\mu\text{L}$  of 6.5% PEG-PBS to be transferred to a new microcentrifuge tube and was centrifuged at  $18,000 \times g$  at  $10^\circ\text{C}$  for 1 h to remove the supernatant. The pellet was resuspended in 300  $\mu\text{L}$  of MilliQ water by sonicating briefly and agitating on a vortex mixer and the mixture was centrifuged at  $18,000 \times g$  at  $10^\circ\text{C}$  for 1



h to remove the supernatant, which was repeated once more. The pellets were suspended with 6  $\mu$ L of MALDI matrix solution (10 mg/mL sinapinic acid in 50% MeCN/MilliQ water). This mixture was spotted onto the sample plate for direct MALDI-TOF MS analysis. MALDI-TOF-mass spectra were acquired in the linear mode by Autoflex speed TOF/TOF (Bruker Daltonics).

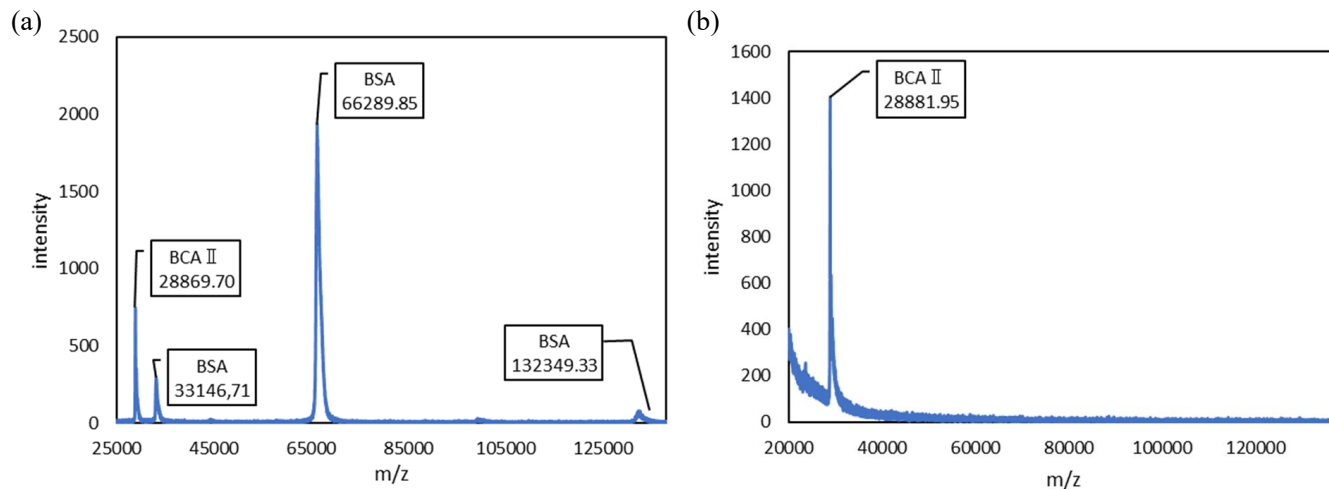

**Figure S6.** MALDI-TOF mass spectra of (a) a mixture of bCAII (calculated for 29,114)<sup>4</sup> and BSA (calculated for 66430).<sup>5</sup> (b) bCAII captured by probe **10** in the presence of BSA.

#### 7-4. Photoaffinity labeling reactions in cell lysate.

Probe **10** (5 pmol, final concentration 50 nM) or **12** (5 pmol, final concentration 50 nM) and HL-60 cell lysate (100  $\mu$ g) or SNU-1 cell lysate (180  $\mu$ g) in 2% CHAPS-RIPA lysis buffer (50 mM Tris HCl pH 7.4, 150 mM NaCl, 1% Triton X-100, 0.5% sodium deoxycholate, 0.1% SDS, 1 mM EDTA, 10 mM NaF, 1 mM  $\text{Na}_3\text{VO}_4$ , 1 mM DTT, 1 mM cOmplete Protease Inhibitor Cocktail/EDTA-free (Roche)) were mixed and incubated on a rotary mixer at 4  $^{\circ}\text{C}$  for 2 h. For a negative control experiment under the competitive binding condition for probe **10**, 1 mM DMSO stock solution of BzSA (final concentration of 100  $\mu$ M against probe **10**) was added to the reaction mixture. For a negative control experiment against probe **12**, clickable gold nanoparticles **2** (50 nM) was used. The mixture was irradiated at 365 nm at a distance of 5 cm on ice for 20 min using a UV lamp (15W, UVP XX Series), which was then diluted in 2 mL of 1% CHAPS-PBS to be transferred to a new microcentrifuge tube. The sample was centrifuged at  $18,000 \times g$  at 10  $^{\circ}\text{C}$  for 1 h to remove the supernatant, washed twice with 500  $\mu$ L of 1% CHAPS-1% octylglucoside (OG)-PBS. The pellet was resuspended in 500  $\mu$ L of 1% CHAPS-PBS by sonicating briefly and agitating on a vortex mixer. This washing step was repeated once more. The resultant pellet was further washed with 1% CHAPS-PBS, which was centrifuged at  $18,000 \times g$  at 10  $^{\circ}\text{C}$  for 1 h and the supernatant was removed. The pellet was suspended in 6 $\times$  Lammeli sample buffer (375 mM Tris, 12% LDS, 50% glycerol, 0.03% bromophenol blue, pH 6.8) containing 10% 2-mercaptoethanol 9% DTT to elute the labeled proteins by heating at 95  $^{\circ}\text{C}$  for 10 min  $\times$  3 and by centrifugation at  $18,000 \times g$  at room temperature for 10 minutes. The supernatant sample was split into two batches, which were separately resolved by SDS-PAGE using 5-20% gradient gels. One of the resultant gels was visualized by Flamingo Pink stain and analyzed by fluorescence imaging on Typhoon 8600.

For western blot analysis, the SDS-PAGE gel was blotted to a PDVF membrane by Trans-Blot® Turbo™ Transfer System (Biorad). The membrane was blocked by 0.3% skim milk in TBST (50 mM Tris-Buffered Saline pH 8.2, 138 mM NaCl, 2.7 mM KCl, 0.1% Tween 20), probed with rabbit anti-hCAII (Rockland, 1:15000), and mouse monoclonal anti-OSBP (Santa Cruz Biotechnology, 1:500) followed by anti-rabbit IgG conjugated with horse radish peroxidase (HRP, Proteintech, 1:10000) or anti-mouse IgG (GE Healthcare, 1:5000) and the protein bands were visualized by chemiluminescence using Typhoon 8600. The membrane detected by anti-hCAII or anti-OSBP was reprobed by rabbit anti-GAPDH (Sigma-Aldrich, 1:500) after stripping using a stripping buffer (62.5 mM Tris-HCl, pH 6.8, 2 % SDS, 100 mM 2-mercaptoethanol).

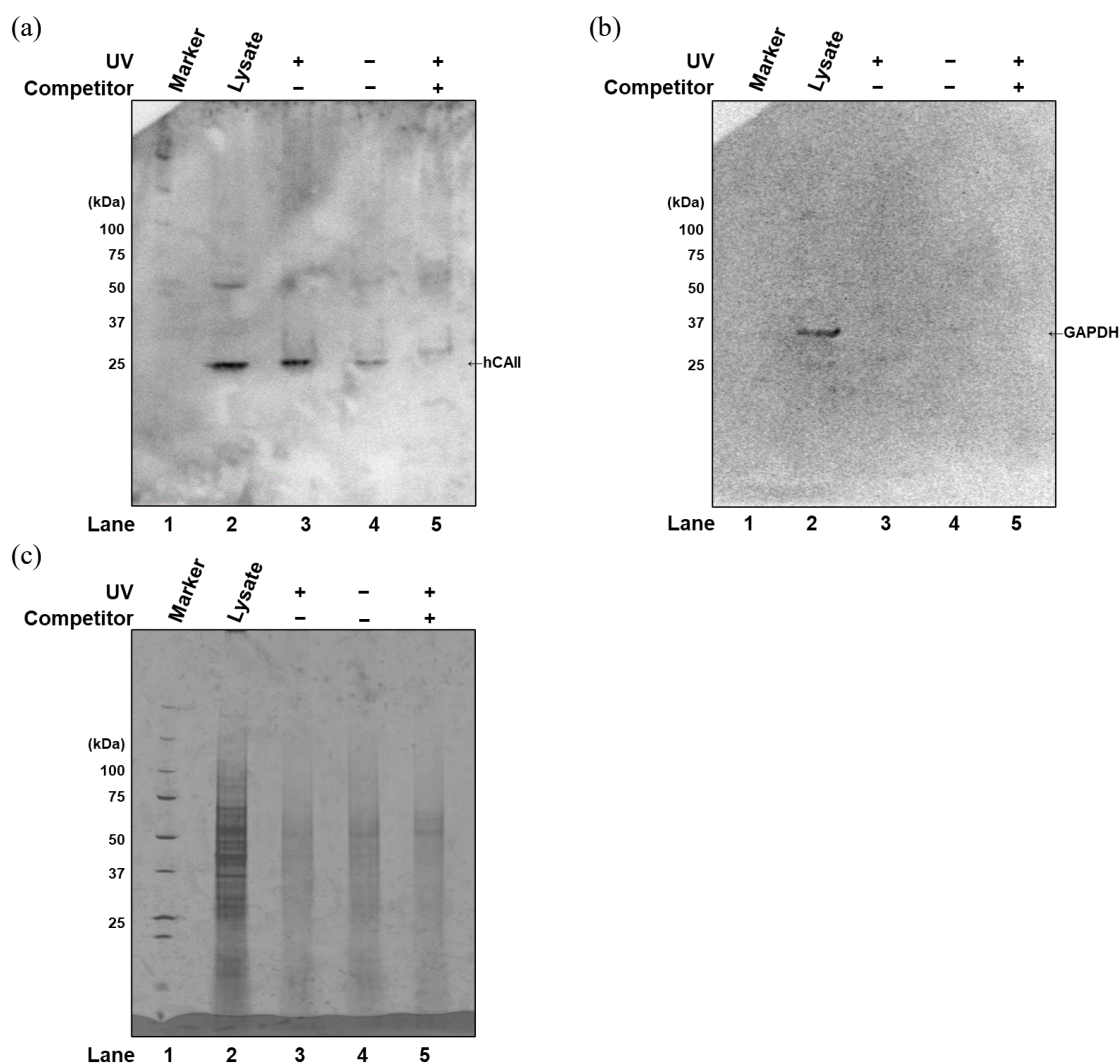

**Figure S7.** Western blot analysis PAL reaction of probe **10** (50 nM) in cell lysate (100 µg) by (a) anti-hCAII or by (b) anti-GAPDH. Lane 1: molecular weight marker, lane 2: lysate input (10 µg), lane 3: photocrosslinked and enriched hCAII, lane 4: negative control with no UV irradiation, lane 5: negative control experiment in the presence of excess BzSA (100 µM) as a competitor. (c) Corresponding Flamingo Pink stained gel for (a).

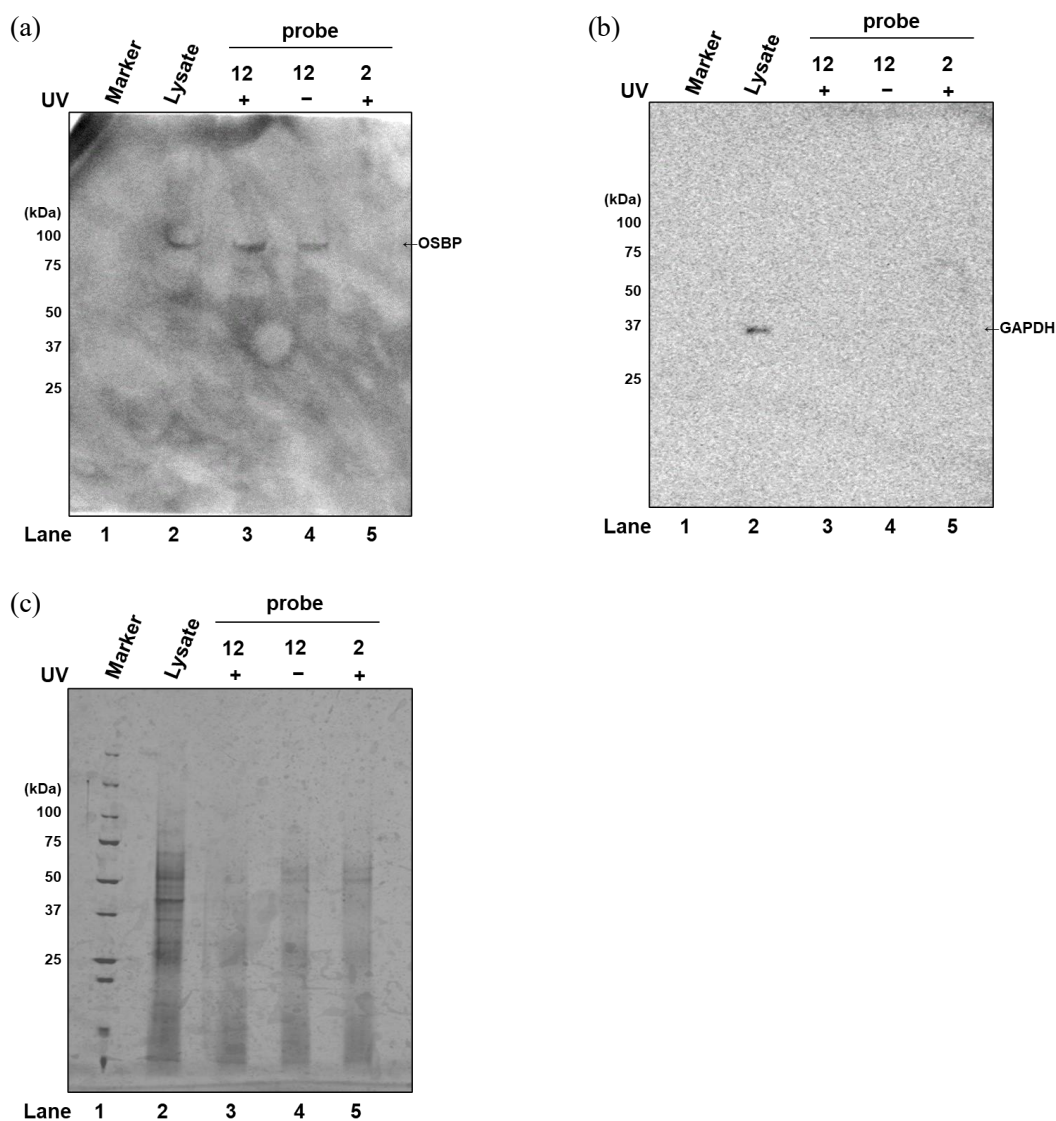

**Figure S8.** Western blot analysis of PAL reaction using probe **12** (50 nM) in cell lysate (180  $\mu$ g) by (a) anti-OSBP or (b) anti-GAPDH. Lane 1: molecular weight maker, lane 2: lysate input (10  $\mu$ g), lane 3: photocrosslinked and enriched OSBP, lane 4: negative control with no UV irradiation, lane 5: negative control experiment with **2** (50 nM). (c) Corresponding Flamingo Pink stained gel for (a).

## 8. Preparation of HL60 and SNU-1 cell lysate

HL60 cells (RIKEN bioresource center) and SNU-1 cells (RIKEN Bioresource Center) was grown till confluent ( $1.0\text{--}3.0 \times 10^6$  cell) in RPMI-1640 (Wako) supplemented with 10% FBS and 1% penicillin/streptomycin in humidified 5% CO<sub>2</sub> atmosphere at 37 °C. The cells were collected using a cell scraper, pelleted by centrifugation ( $300 \times g$ , 4°C, 5 minutes) and washed with PBS (0.02 w/v% KCl, 0.8 w/v% NaCl, 0.02 w/v% KH<sub>2</sub>PO<sub>4</sub>, 0.115 w/v% Na<sub>2</sub>HPO<sub>4</sub>) two times. The pellet was suspended in RIPA lysis buffer (50 mM Tris-HCl pH 7.4, 150 mM NaCl, 1% TritonX-100, 0.5% sodium

deoxycholate, 0.1% SDS, 1 mM EDTA, 10 mM NaF, 1 mM Na<sub>3</sub>VO<sub>4</sub>, 1 mM DTT, 1 mM or 2 mM protease inhibitor cocktail (Roche)). After incubation on ice for 20 minutes, the sample was centrifuged (18000 × g, 4 °C, 30 minutes) to give the supernatant as the cell lysate solution. The concentration of the cell lysate was determined by protein BCA assay (Wako protein assay BCA kit) using a plate reader (Biorad iMark microplate reader).

## References

1. a) K. Sakurai, Y. Hatai, and A. Okada, Gold nanoparticle-based multivalent carbohydrate probes: selective photoaffinity labeling of carbohydrate-binding proteins. *Chem. Sci.*, 2016, **7**, 702. (b) S. Narita, N. Kobayashi, K. Mori and K. Sakurai, Clickable gold nanoparticles for streamlining capture, enrichment and release of alkyne-labelled proteins *Bioorg. Med. Chem. Lett.*, 2019, **29**, 126768. (c) K. Sakurai, A. Kato and K. Adachi, Design and synthesis of small molecule-conjugated photoaffinity nanoprobes for a streamlined analysis of binding proteins. *Bioorg. Med. Chem. Lett.*, 2018, **28**, 3227.
2. M. Hiraizumi, R. Komatsu, T. Shibata, Y. Ohta and K. Sakurai, Dissecting the structural basis for the intracellular delivery of OSW-1 by fluorescent probes. *Org. Biomol. Chem.*, 2017, **15**, 3568.
3. W. Haiss, N. Thanh, J. Aveyard and D. G. Fernig, Determination of size and concentration of gold nanoparticles from UV-vis spectra. *Anal. Chem.* 2007, **79**, 4215.
4. The calculated molecular weight is based on the sequence for UniProtKB-P00921 (CAH2\_BOVIN).
5. The calculated molecular weight is based on the processed sequence for UniProtKB-P02769 (ALBU\_BOVIN; Chain PRO\_0000001058 25 – 607).
6. In the section 7, 6.5% PEG denotes for 6.5 w/w% aqueous solution of PEG8000.

$^1\text{H}$  NMR ( $\text{CDCl}_3$ , 400 MHz) of compound **13**

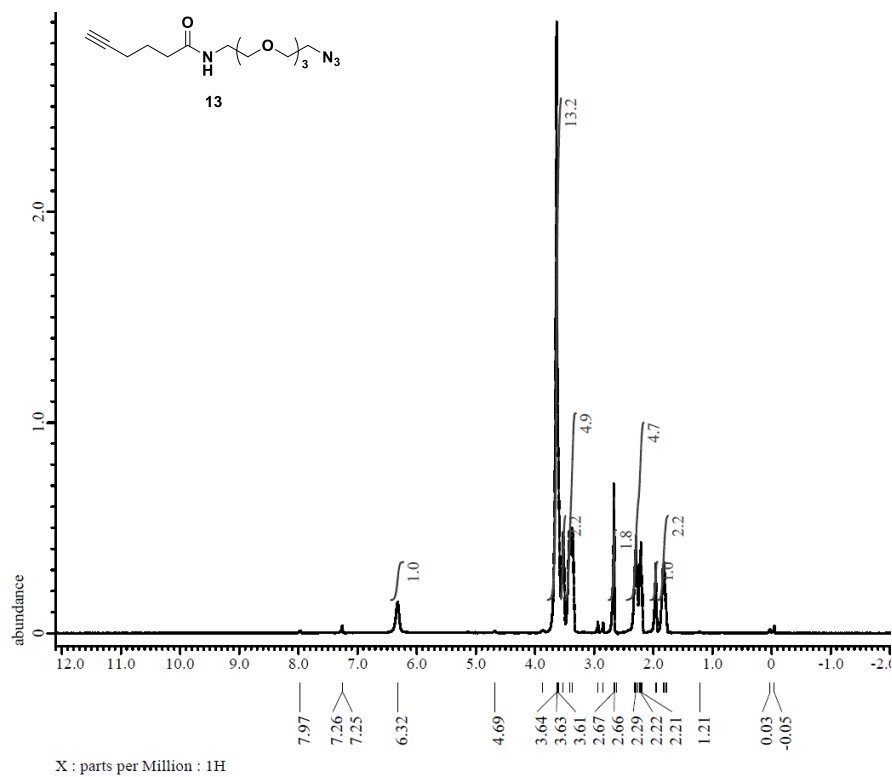

$^{13}\text{C}$  NMR ( $(\text{CD}_3)_2\text{SO}$ , 400 MHz) of compound **13**

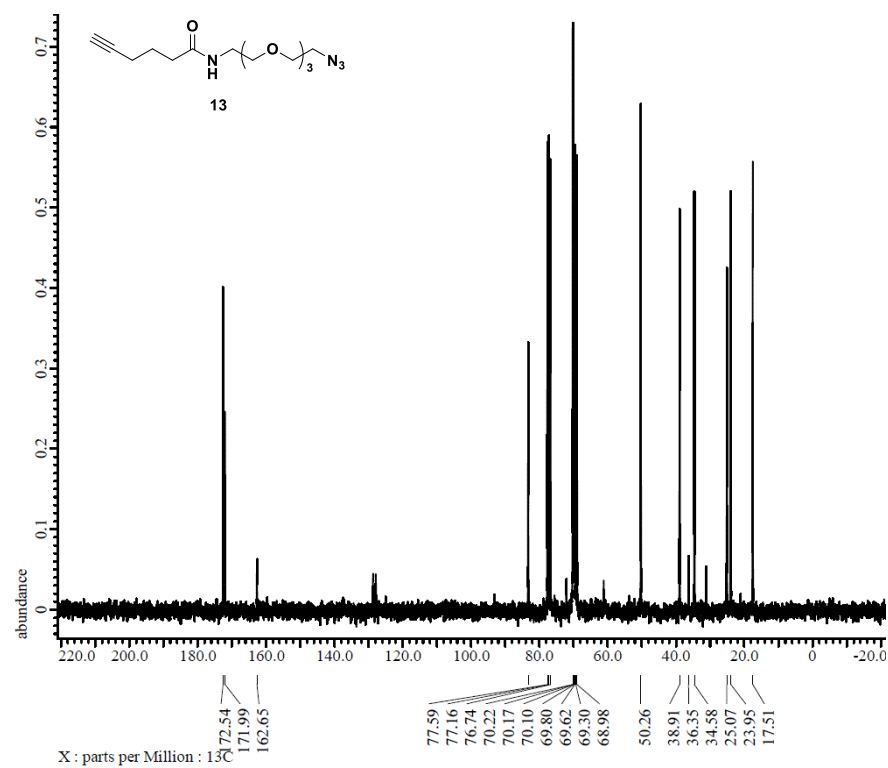

$^1\text{H}$  NMR ( $\text{CDCl}_3$ , 400 MHz) of compound **4**

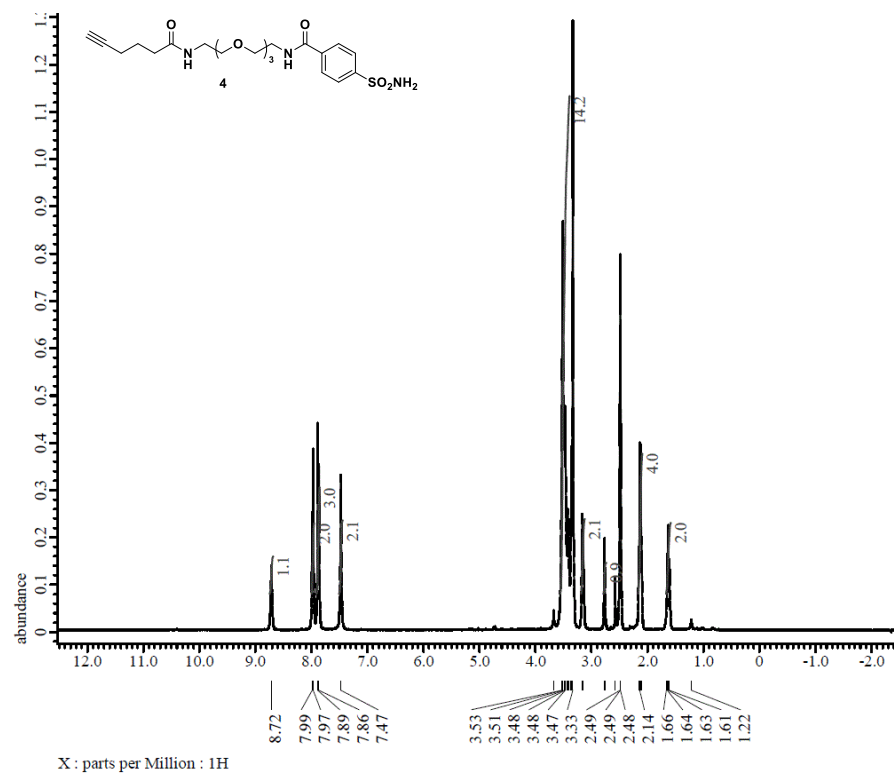

$^{13}\text{C}$  NMR ( $(\text{CD}_3)_2\text{SO}$ , 400 MHz) of compound **4**

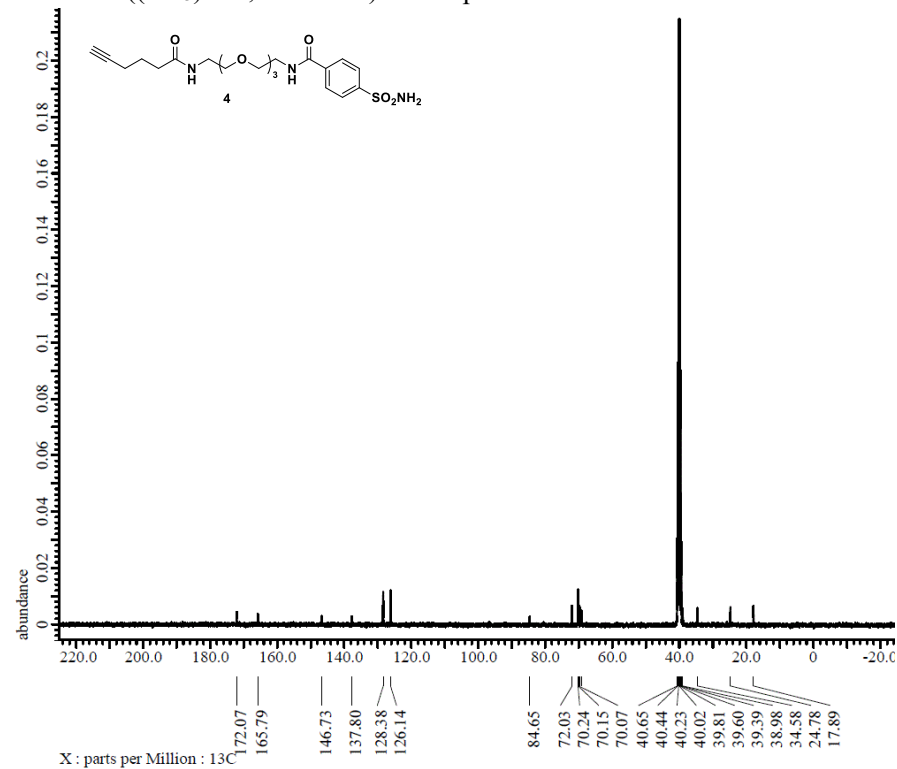

Supplement: d0ob01688h1.pdf [file d0ob01688h1.pdf]
